# Supplementary material for: An assessment of the potential of invasive weeds as multiple feedstocks for biofuel production
Source: Royal Society of Chemistry journal article supplement (doi:10.1039/c5ra27787f), 2016-01-01
Supplement: c5ra27787f1.pdf [file c5ra27787f1.pdf]

An Assessment of Invasive Weeds as Multiple Feedstocks for Biofuels Production

Arupjyoti Borah, Shuchi Singh, Arun Goyal and Vijayanand S. Moholkar

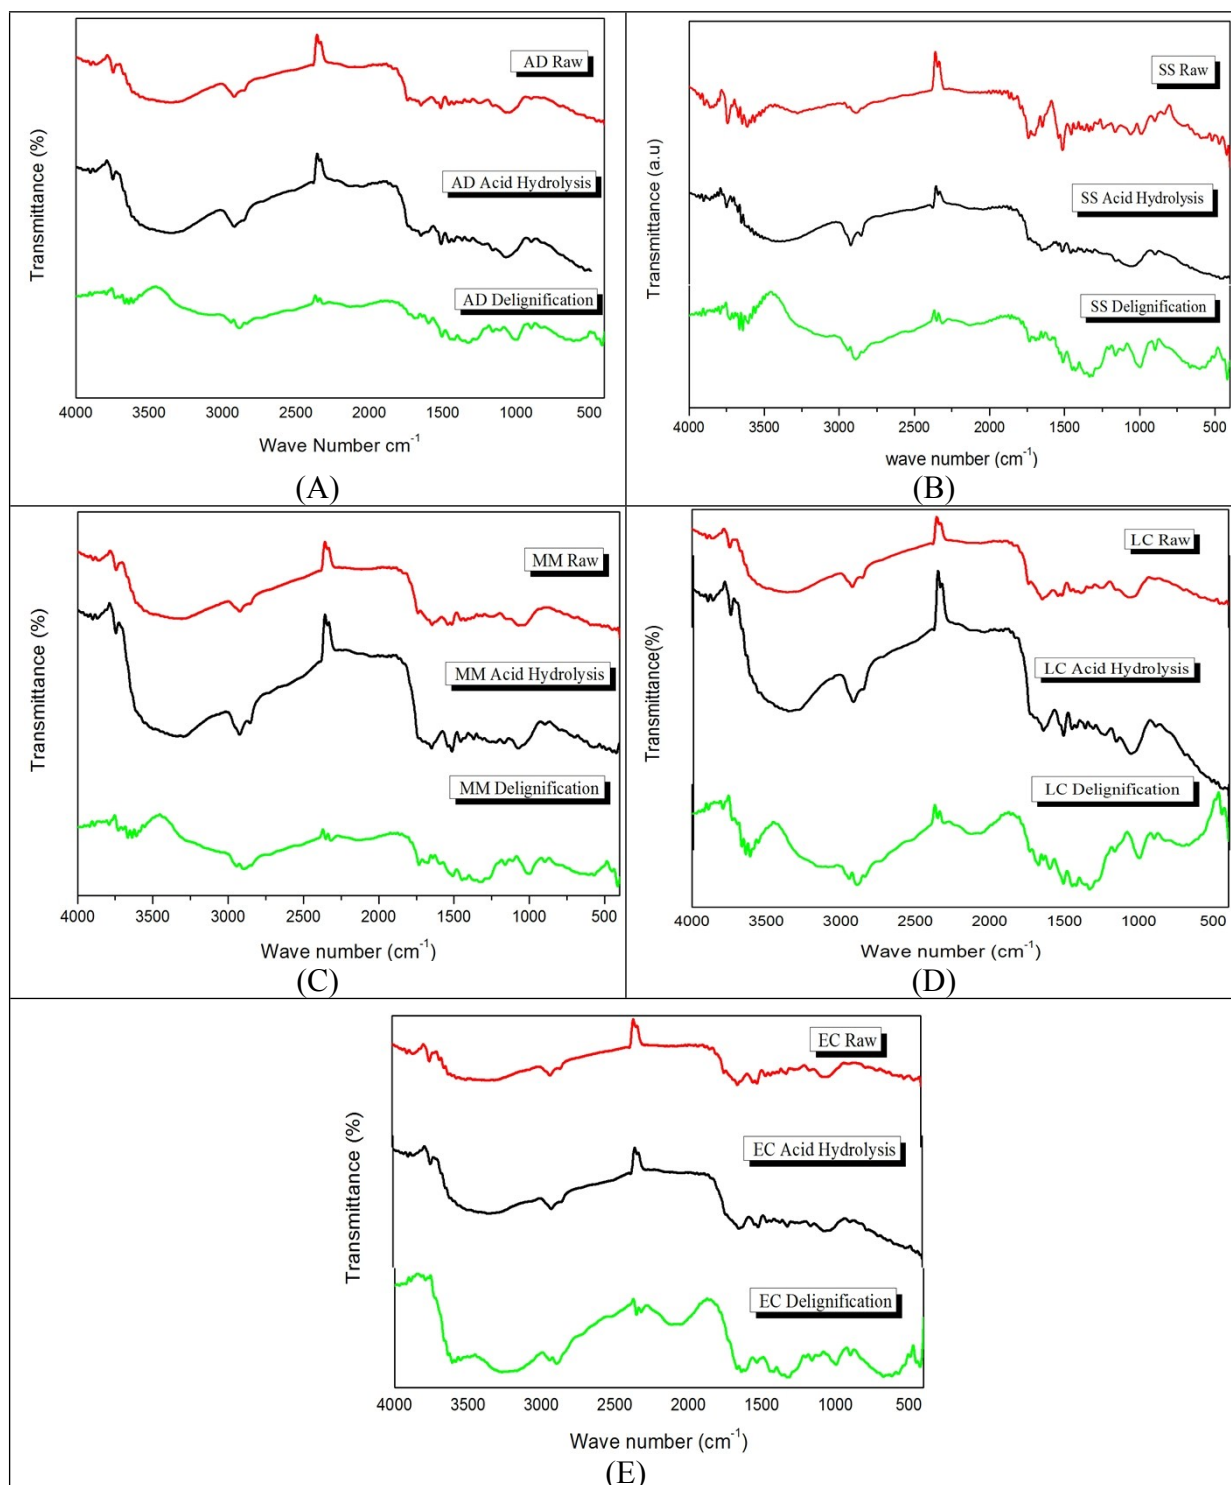

Figure S.1: FTIR spectra of native or raw biomass, biomass after dilute (1%) acid hydrolysis with autoclaving (121°C, 15 psi) and biomass after alkaline delignification (1.5% w/v NaOH with sonication). (A) *Arundo donax*; (B) *Saccharum spontaneum*; (C) *Mikania micrantha*; (D) *Lantana camara*; (E) *Eichhornia crassipes*

## An Assessment of Invasive Weeds as Multiple Feedstocks for Biofuels Production

Arupjyoti Borah, Shuchi Singh, Arun Goyal and Vijayanand S. Moholkar

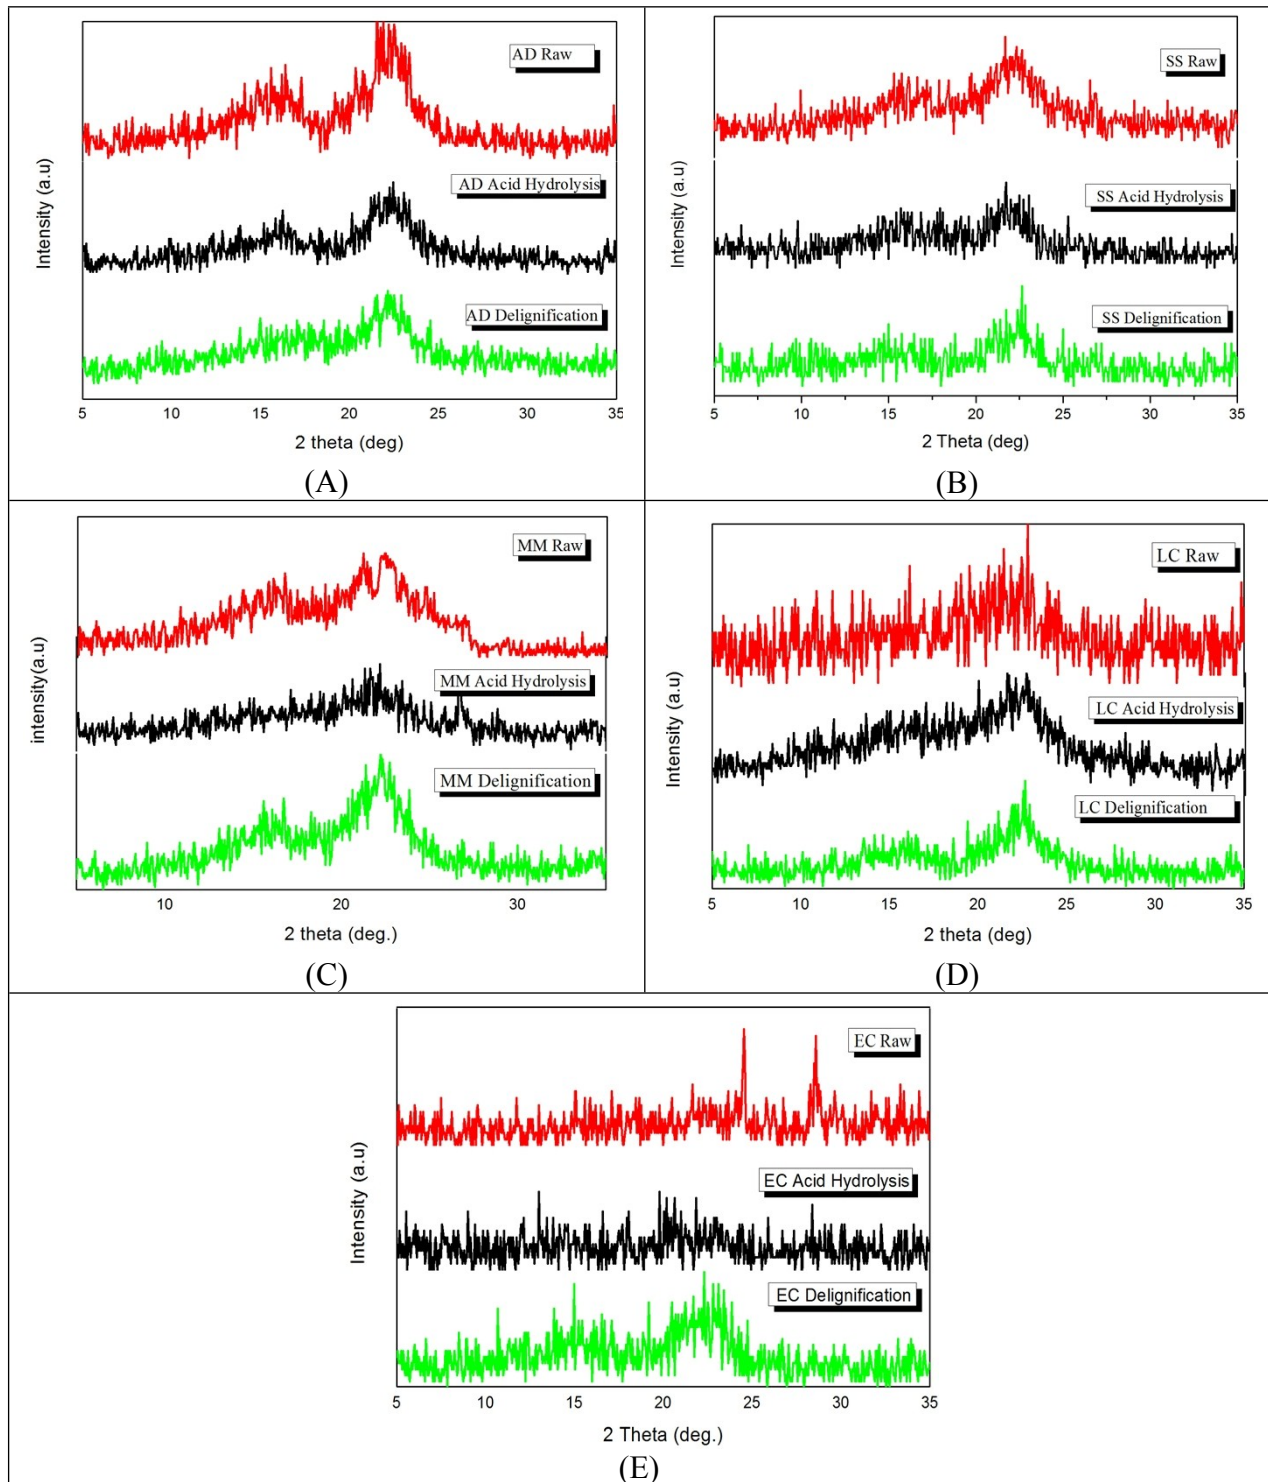

Figure S.2: X-ray diffractograms of five biomass species, viz. native biomass and the biomass after different pretreatments. (A) *Arundo donax*; (B) *Saccharum spontaneum*; (C) *Mikania micrantha*; (D) *Lantana camara*; (E) *Eichhornia crassipes*
